# Supplementary material
Source: publisher figshare collection journal article supplement (https://acs.figshare.com/ndownloader/files/17288153)

# Ultra-trace metal speciation analysis by coupling of sector-field ICP-MS to high-resolution size exclusion and reversed-phase liquid chromatography

Hendrik Küpper<sup>1,2\*</sup>, Syed Nadeem Hussain Bokhari<sup>1</sup>, Noelia Jaime-Pérez<sup>1</sup>, Lyudmila Lyubenova<sup>1</sup>, Nermeen Ashraf<sup>1</sup>, Elisa Andresen<sup>1</sup>.

1) Biology Center of the Czech Academy of Sciences, Institute of Plant Molecular Biology, Department of Plant Biophysics and Biochemistry, Branišovská 31/1160, 370 05 České Budějovice, Czech Republic

2) University of South Bohemia, Department of Experimental Plant Biology, Branišovská 31/1160, 370 05 České Budějovice, Czech Republic

\* Author for correspondence: Hendrik Küpper <hendrik.kuepper@umbr.cas.cz>

## Supporting information

### Table of contents

**Tables S1.** Examples ICP-MS methods optimised for the measurements shown in this work.

**Figure S1.** Analysis of copper abundance in an LH1 preparation from *Rhodospirillum rubrum* grown on 2  $\mu$ M Cu<sup>2+</sup>.

**Figure S2.** Measurement of a [Cd]-Chl standard.

**Tables S1.** Description of contents: This supplement describes the technical parameters for adjusting the ICP-MS in order to yield optimal performance for the different tasks described here.

**Cu method for aqueous buffer and organic matrix**

Total time: 60 min

Runs: 505

Passes: 1

Tune in aqueous buffer and with desolvating unit

Tune with methanol and acetone with spray chamber and no desolvating unit

Resolution: Medium

| Analyte          | Mass window % | Samples/peak | Segment duration (Seconds) |
|------------------|---------------|--------------|----------------------------|
| Mg <sup>24</sup> | 140           | 20           | 1.96                       |
| Cu <sup>63</sup> | 125           | 20           | 2.00                       |
| Zn <sup>66</sup> | 125           | 20           | 2.00                       |

**La method for aqueous buffer**

Total time: 270 min

Runs: 1795

Passes: 1

Tune in aqueous buffer

Resolution: Medium

| Analyte           | Mass window % | Samples/peak | Segment duration (Seconds) |
|-------------------|---------------|--------------|----------------------------|
| Mg <sup>24</sup>  | 125           | 20           | 0.625                      |
| P <sup>31</sup>   | 125           | 20           | 0.625                      |
| S <sup>32</sup>   | 125           | 20           | 0.625                      |
| Ca <sup>44</sup>  | 125           | 20           | 0.625                      |
| Mn <sup>55</sup>  | 125           | 20           | 0.600                      |
| Fe <sup>56</sup>  | 125           | 20           | 0.600                      |
| Co <sup>59</sup>  | 125           | 20           | 0.625                      |
| Cu <sup>63</sup>  | 125           | 20           | 1.000                      |
| Zn <sup>66</sup>  | 125           | 20           | 0.625                      |
| La <sup>139</sup> | 125           | 20           | 1.750                      |

**Cd method for organic matrix**

Total time: 60 min

Runs: 505

Passes: 1

Tune with methanol and acetone with spray chamber and no desolvating unit

Resolution: Medium

| Analyte           | Mass window % | Samples/peak | Segment duration (Seconds) |
|-------------------|---------------|--------------|----------------------------|
| Mg <sup>24</sup>  | 140           | 20           | 1.96                       |
| Cd <sup>111</sup> | 125           | 20           | 2.00                       |
| Zn <sup>66</sup>  | 125           | 20           | 2.00                       |

**Cd method for aqueous buffer**

Total time: 270 min

Runs: 1260

Passes: 1

Tune in aqueous buffer and desolvating unit

Resolution: Medium

| Analyte           | Mass window<br>% | Samples/peak | Segment duration<br>(Seconds) |
|-------------------|------------------|--------------|-------------------------------|
| Mg <sup>24</sup>  | 140              | 20           | 1.4000                        |
| P <sup>31</sup>   | 125              | 20           | 0.500                         |
| S <sup>32</sup>   | 125              | 20           | 2.500                         |
| Fe <sup>56</sup>  | 125              | 20           | 0.250                         |
| Co <sup>59</sup>  | 125              | 20           | 1.250                         |
| Cu <sup>63</sup>  | 125              | 20           | 0.250                         |
| Zn <sup>66</sup>  | 125              | 20           | 0.250                         |
| Mo <sup>95</sup>  | 125              | 20           | 1.000                         |
| Cd <sup>111</sup> | 125              | 20           | 5.000                         |

**Cr method for aqueous buffer**

Total time: 270 min

Runs: 1160

Passes: 1

Tune in aqueous buffer and desolvating unit

Resolution: Medium

| Analyte          | Mass window<br>% | Samples/peak | Segment duration<br>(Seconds) |
|------------------|------------------|--------------|-------------------------------|
| Mg <sup>24</sup> | 140              | 20           | 1.4000                        |
| P <sup>31</sup>  | 125              | 20           | 0.500                         |
| S <sup>32</sup>  | 125              | 20           | 2.500                         |
| Fe <sup>56</sup> | 125              | 20           | 0.250                         |
| Co <sup>59</sup> | 125              | 20           | 1.250                         |
| Cu <sup>63</sup> | 125              | 20           | 0.250                         |
| Zn <sup>66</sup> | 125              | 20           | 0.250                         |
| Mo <sup>95</sup> | 125              | 20           | 1.000                         |
| Cr <sup>52</sup> | 125              | 20           | 5.000                         |

**Figure S1.** Analysis of copper abundance in an LH1 preparation from *Rhodospirillum rubrum* grown on 2  $\mu\text{M}$   $\text{Cu}^{2+}$ . Acetone extract from the protein preparation of a replicate experiment. The separation was performed on a metal-free PRP-C18 2.1x250 mm column, leading to a much lower background of Cu than the originally used C18 column with steel housing (Fig. 8b), but otherwise confirming the Cu binding to the pigments (Fig. 8b).

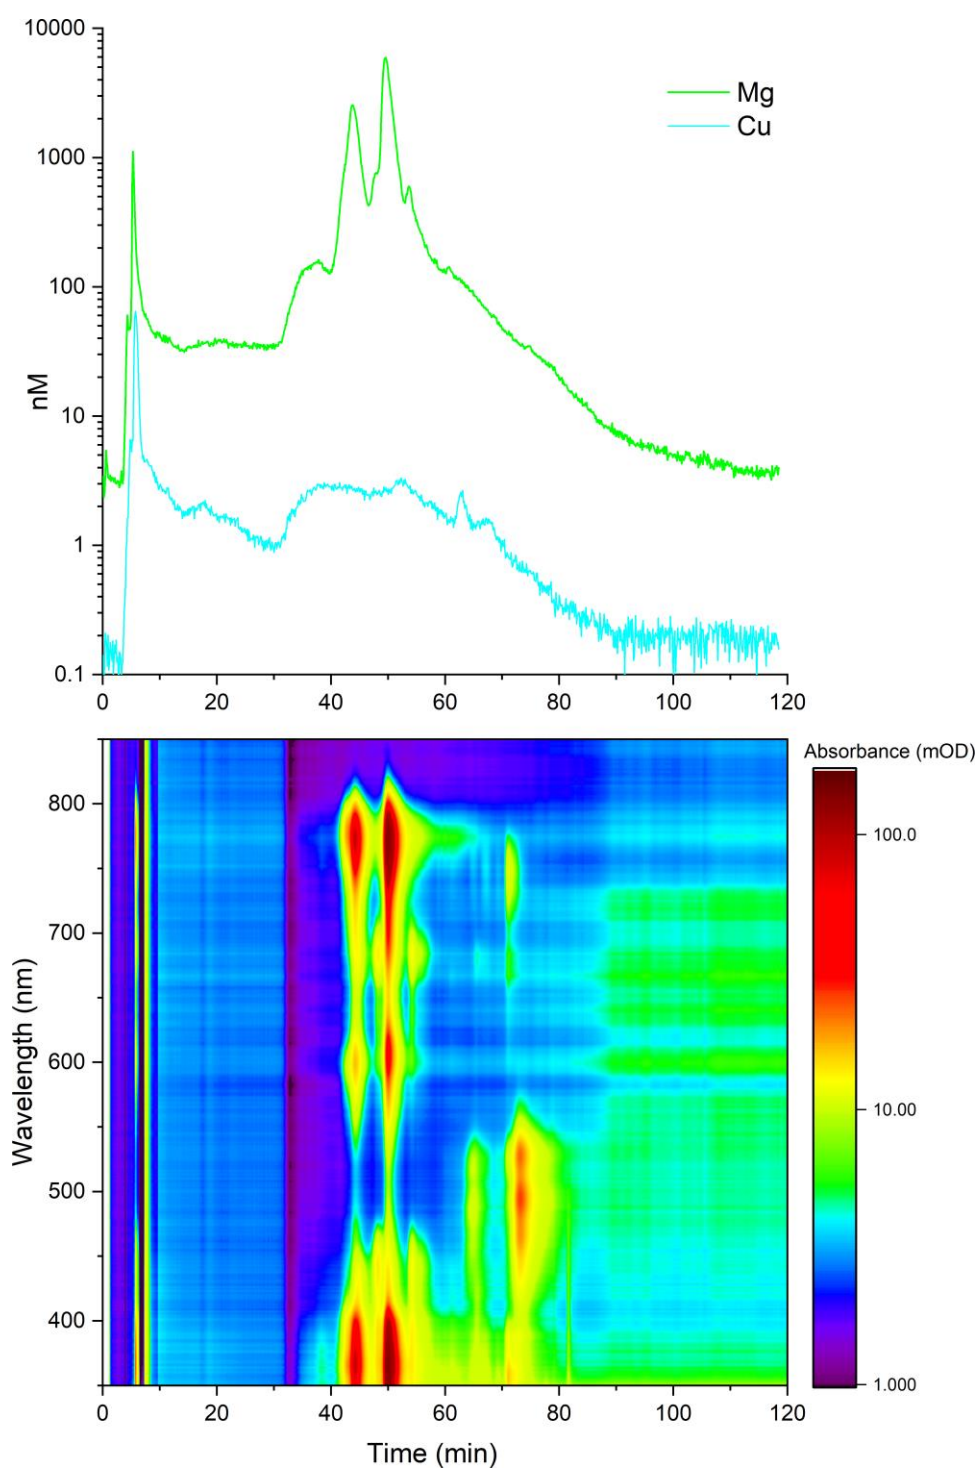

**Figure S2.** Description of contents: This supplement shows the HPLC-ICPMS measurement of a [Cd]-Chl standard that was prepared by Küpper et al. (2007). The separation was performed on a C18 4.6x250 mm column as described in more detail in the methods section for pigment HPLC-ICPMS

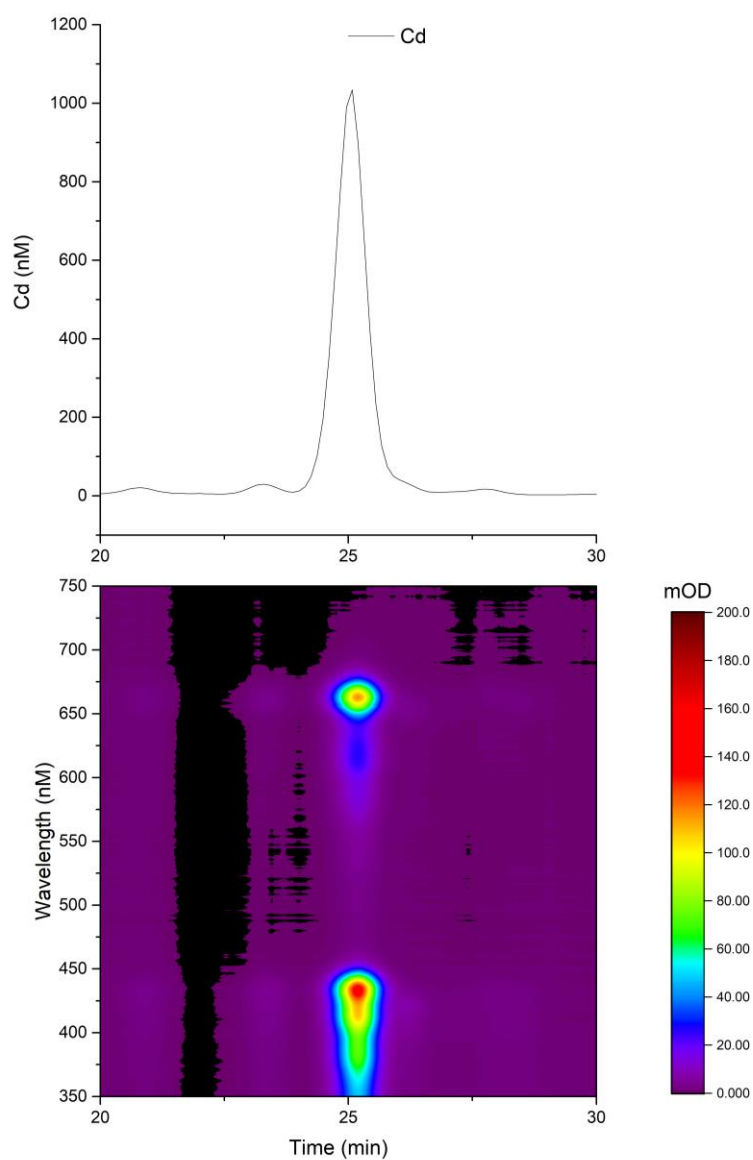

Supplement: Supplementary file 1 [file 17288153]
